# Supplementary material for: Exposure to household furry pets influences the gut microbiota of infant at 3–4 months following various birth scenarios
Source: PubMed Central journal article supplement (PMC5382463; doi:10.1186/s40168-017-0254-x), 2017-04-06

### (A) Vaginal, IAP- (N=135)

a: Ruminococcaceae

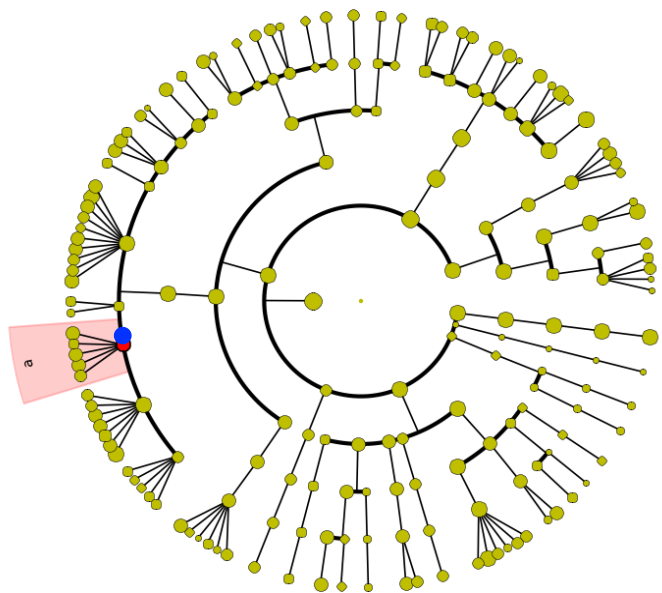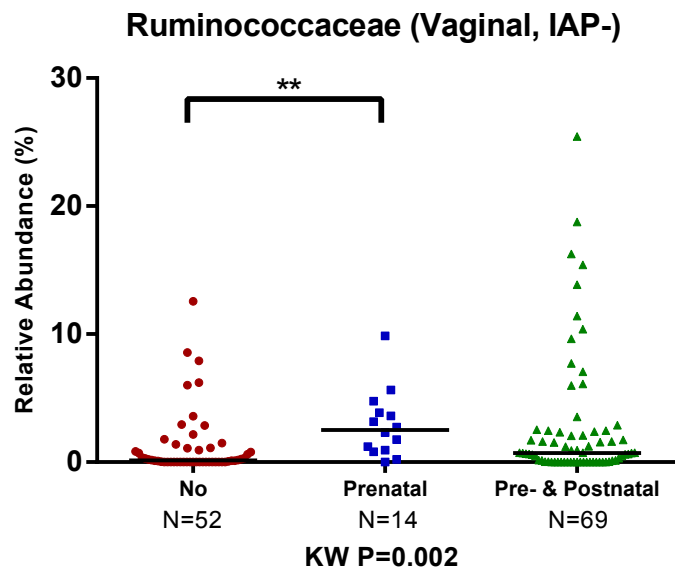

### (B) Vaginal, IAP+ (N=57)

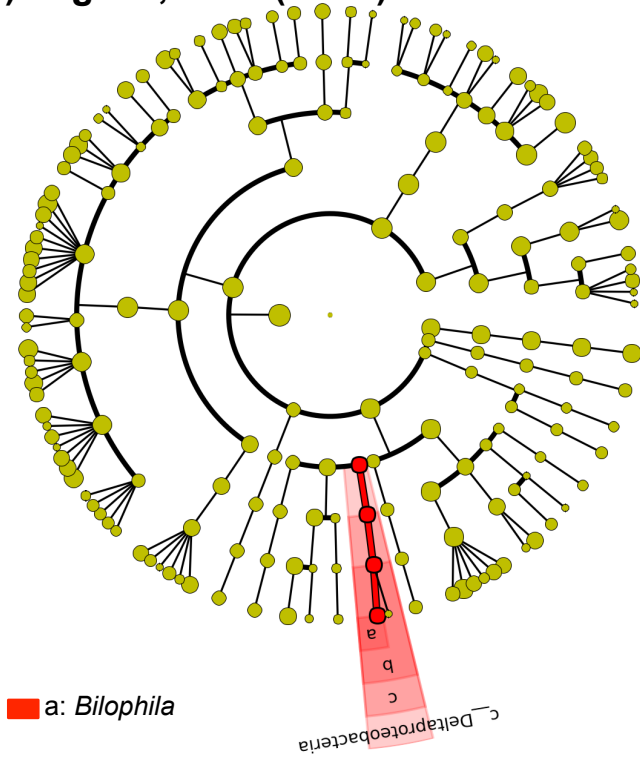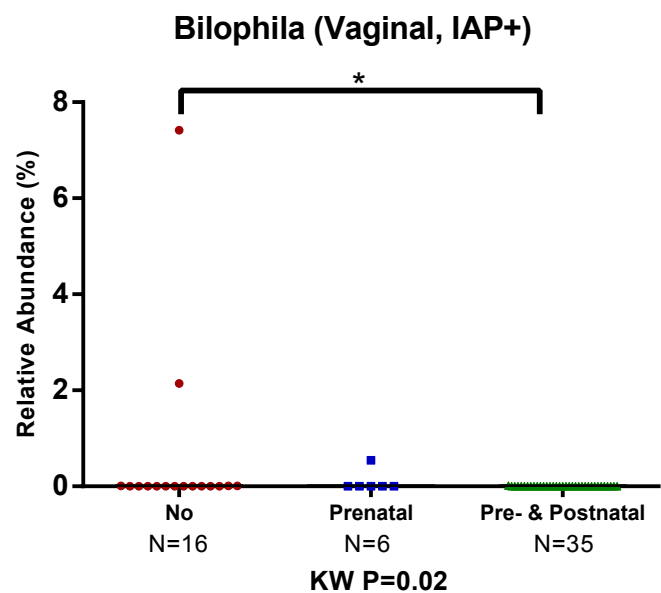

### (C) Emergency-CS (N=35)

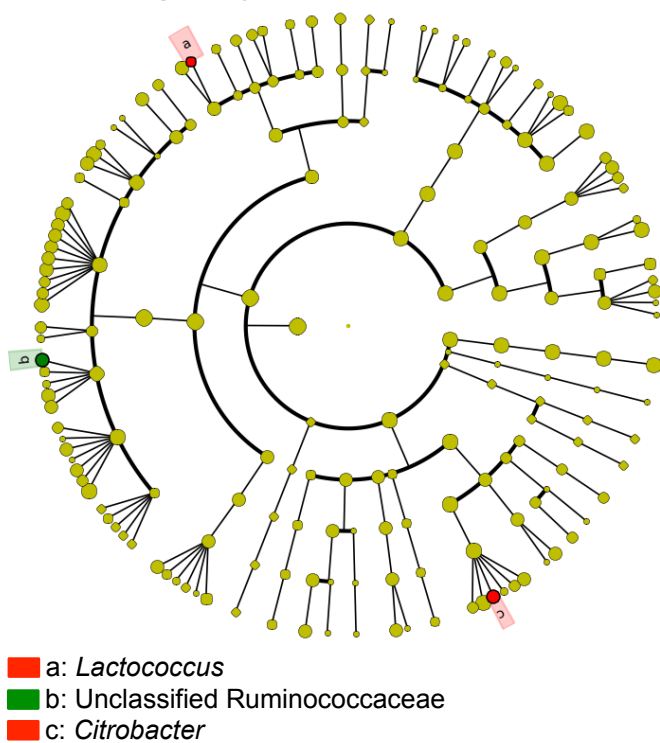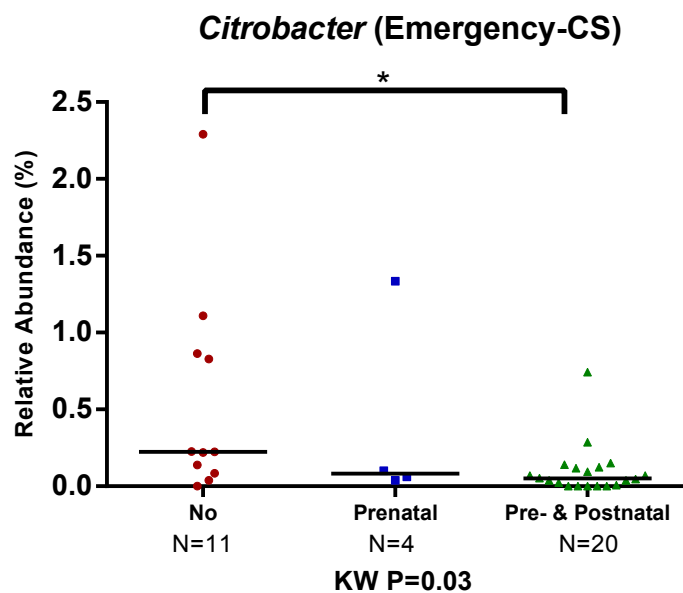

#### Unclassified Ruminococcaceae (Emergency-CS)

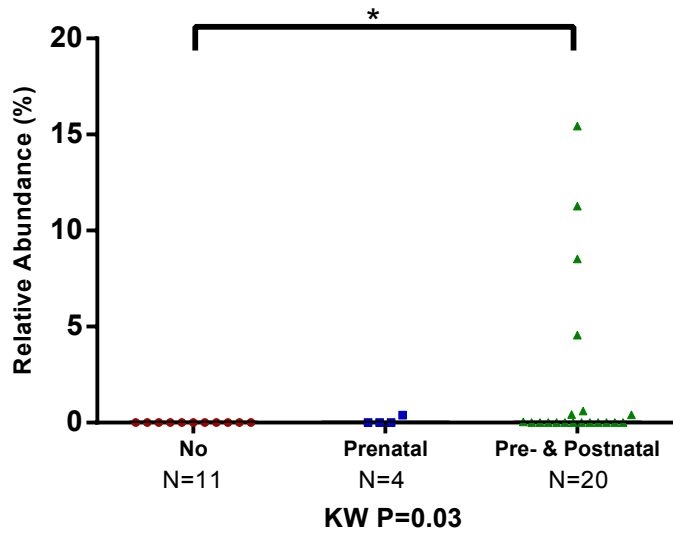

#### Lactococcus (Emergency-CS)

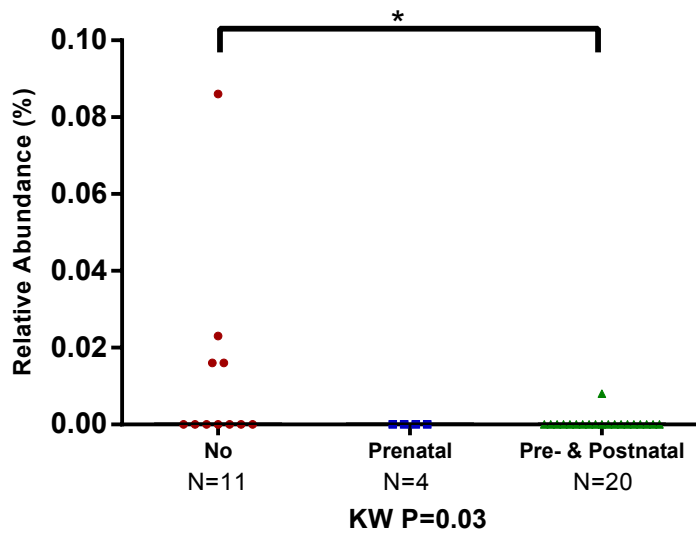

Supplement: 40168_2017_254_MOESM7_ESM.pdf [file 40168_2017_254_MOESM7_ESM.pdf]
